# Supplementary material for: Short-Term Effects of Healthy Eating Pattern Cycling on Cardiovascular Disease Risk Factors: Pooled Results from Two Randomized Controlled Trials
Source: PubMed Central journal article supplement (PMC6266045; doi:10.3390/nu10111725), 2018-11-10
Supplement: nutrients-10-01725-s001.pdf [file nutrients-10-01725-s001.pdf]

**Figure S1: Participant recruitment diagram**

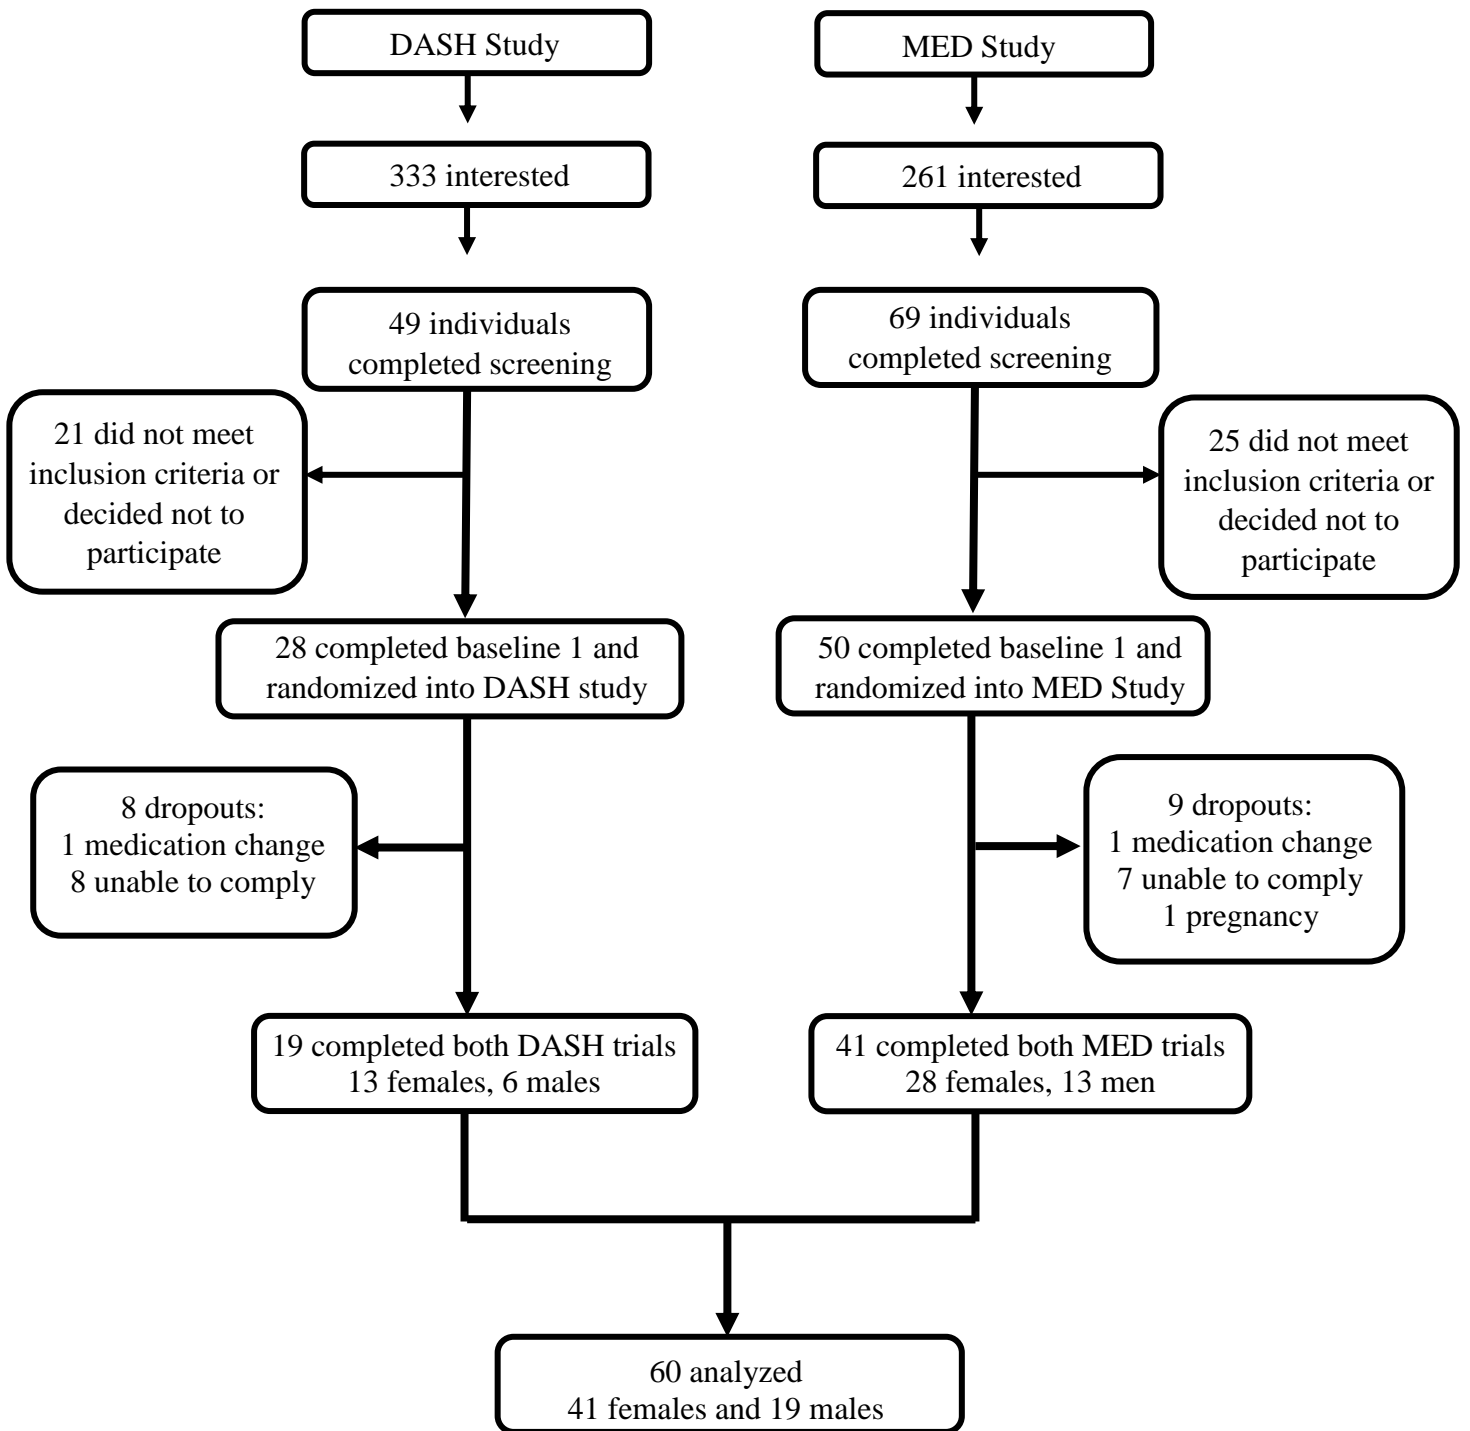

**Table S1.** Changes in cardiovascular disease risk factors during repeated periods of consuming a prescribed healthy eating pattern (HEP).

|                           | HEP 1<br><i>Adopting HEP</i> | HEP 2<br><i>Readopting HEP</i> | HEP adoption p value <sup>1</sup> | HEP order p value <sup>2</sup> |
|---------------------------|------------------------------|--------------------------------|-----------------------------------|--------------------------------|
| 24-hr SBP (mm Hg)         | -5 ± 1*                      | -7 ± 1 *                       | <0.0001                           | 0.4354                         |
| 24-hr DBP (mm Hg)         | -3 ± 1*                      | -3 ± 1 *                       | <0.0001                           | 0.9366                         |
| Waking SBP (mm Hg)        | -5 ± 1*                      | -7 ± 2 *                       | <0.0001                           | 0.7556                         |
| Waking DBP (mm Hg)        | -4 ± 1*                      | -4 ± 1 *                       | <0.0001                           | 0.9903                         |
| Sleeping SBP (mm Hg)      | -4 ± 2                       | -5 ± 2 *                       | 0.0005                            | 0.5294                         |
| Sleeping DBP (mm Hg)      | -2 ± 1                       | -2 ± 1 *                       | 0.0018                            | 0.3963                         |
| Fasting SBP (mm Hg)       | -6 ± 1*                      | -5 ± 1 *                       | <0.0001                           | 0.9023                         |
| Fasting DBP (mm Hg)       | -4 ± 1*                      | -4 ± 1 *                       | <0.0001                           | 0.6146                         |
| Total cholesterol (mg/dL) | -19 ± 3*                     | -13 ± 3 *                      | <0.0001                           | 0.0906                         |
| LDL cholesterol (mg/dL)   | -13 ± 3 <sup>3a</sup>        | -6 ± 3 <sup>4¥</sup>           | <0.0001                           | 0.0202                         |
| HDL cholesterol (mg/dL)   | -4 ± 1*                      | -5 ± 1 *                       | <0.0001                           | 0.6306                         |
| Triglycerides (mg/dL)     | -7 ± 6                       | -10 ± 6                        | 0.0505                            | 0.7528                         |
| TC:HDL                    | -0.08 ± 0.08                 | 0.06 ± 0.07                    | 0.8798                            | 0.1398                         |
| Glucose (mg/dL)           | -1 ± 1                       | 1 ± 1                          | 0.9103                            | 0.3266                         |
| Insulin (µIU/mL)          | -1.4 ± 1                     | -2.8 ± 1                       | 0.0037                            | 0.3057                         |
| HOMA-IR                   | -0.388 ± 0.224               | -0.621 ± 0.224                 | 0.0024                            | 0.4611                         |
| Body mass (kg)            | -2.2 ± 0.2 <sup>3a</sup>     | -1.4 ± 0.2 <sup>4b</sup>       | <0.0001                           | 0.0013                         |
| Body fat (%)              | -1.1 ± 0.3*                  | -1.1 ± 0.3*                    | <0.0001                           | 0.9432                         |

Results are presented as LS means ± SEM of LS means adjusted for age, sex, body mass at each time point, study, and designated treatment within each study with a random participant effect,  $n = 60$ . <sup>1</sup> overall time effect of adopting HEP (all data combined during HEP 1 and HEP2) <sup>2</sup> changes from baseline in HEP 1 vs changes from baseline in HEP 2 (time × order interaction), \* indicates a HEP-specific change over time assessed when time or time × order  $p$  value <0.05, different letters indicate different magnitude in changes over time, ¥ indicates trend  $p = 0.061$  for difference in magnitude of HEP 1 and HEP 2, Conversion factor to SI units as follows: total, LDL, and HDL cholesterol mmol/L = mg/dL × 0.0259, triglycerides mmol/L = mg/dL × 0.0113, glucose mmol/L = mg/dL × 0.0555, and insulin pmol/L = µIU/mL × 6.945.
